# Supplementary material for: Interactions between pH, reactive species, and cells in plasma-activated water can remove algae
Source: Royal Society of Chemistry journal article supplement (doi:10.1039/d1ra07774k), 2022-01-01
Supplement: d1ra07774k1.pdf [file d1ra07774k1.pdf]

## Supporting Information

Using the two-line intensity comparison method, the electron temperature was calculated from the intensity ratio of the two lines at H<sub>α</sub> (656 nm) and H<sub>β</sub> (486 nm)<sup>1)</sup>. Since the spectral intensity of a line is expressed in terms of the upper level density N, transition probability A, and energy per photon hν, the intensity of the line spectrum at each transition is as follows.

$$I_{ij} = h\nu_{ij}A_{ij}N_i \quad (1)$$

$$I_{kl} = h\nu_{kl}A_{kl}N_k \quad (2)$$

When discharged at high pressure, such as atmospheric pressure, the collisions between electrons, ions, and neutral particles are so intense that the particles exchange enough kinetic energy to reach thermal equilibrium. At this time, the electron temperature T<sub>e</sub>, ion temperature T<sub>i</sub>, and neutral particle temperature T<sub>n</sub> are equal, as shown in equation (3).

$$T = T_e = T_i = T_n \quad (3)$$

Since the distribution of the density of each level is expressed by the Boltzmann distribution, the density ratio is as shown in equation (4).

$$\frac{N_i}{N_k} = \frac{g_i}{g_k} \exp\left\{-\frac{E_i - E_k}{kT_e}\right\} \quad (4)$$

By transforming equation (5), equation (6) can be obtained. The values used in the calculations are shown in the Table S1.

I: Line spectral intensity

g: statistical weight

ν: Frequency (s<sup>-1</sup>)

A: Einstein coefficient (s<sup>-1</sup>)

T<sub>e</sub>: electron temperature (K)

K: Boltzmann constant (J/K)

E: Potential energy (J)

## References

- 1) J. Yamada, *Plasma and Fusion Research*, 1993, **69**, 784-792

Fig.S1 A basil growth test to investigate the possibility of using PAW for plant growth

Fig.S2 CV curves for electrodeposited iridium oxide

Fig.S3 PH response gradient of iridium oxide electrodeposited electrodes (n=7)

Fig.S4 Reversibility evaluation in pH responsiveness of electrodeposited iridium oxide electrodes

Fig.S5 Fluorescence measurement results when peroxyxynitrite was generated under each pH condition

Fig.S6 Identifying the pH range in which peroxyxynitrite can be generated

Fig.S7 The schematic diagram of batch type in-liquid plasma system

Fig.S8 Experimental system for measuring pH in the near of cells

**Table S1** Value used to calculate electron temperature

**Table S2** Power condition,  $H\alpha$ ,  $H\beta$  and electron temperature corresponding to entry

**Table S3** Mixing ratio of various stock solutions for Hoagland solution adjustment

Fig.S1

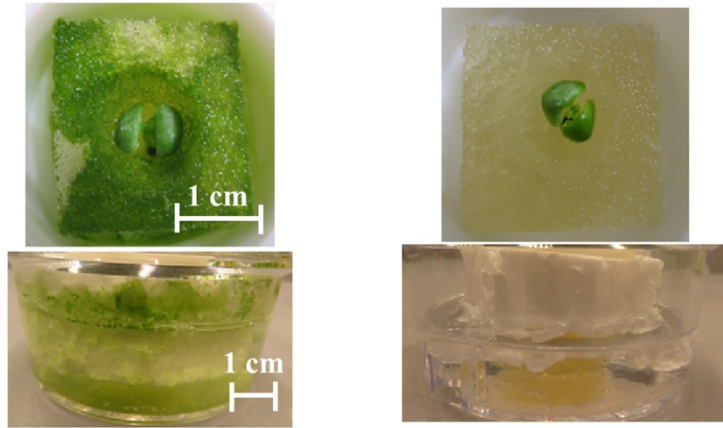

**(a) The Hoagland solution**

**(b) Plasma activated water**

Fig.S2

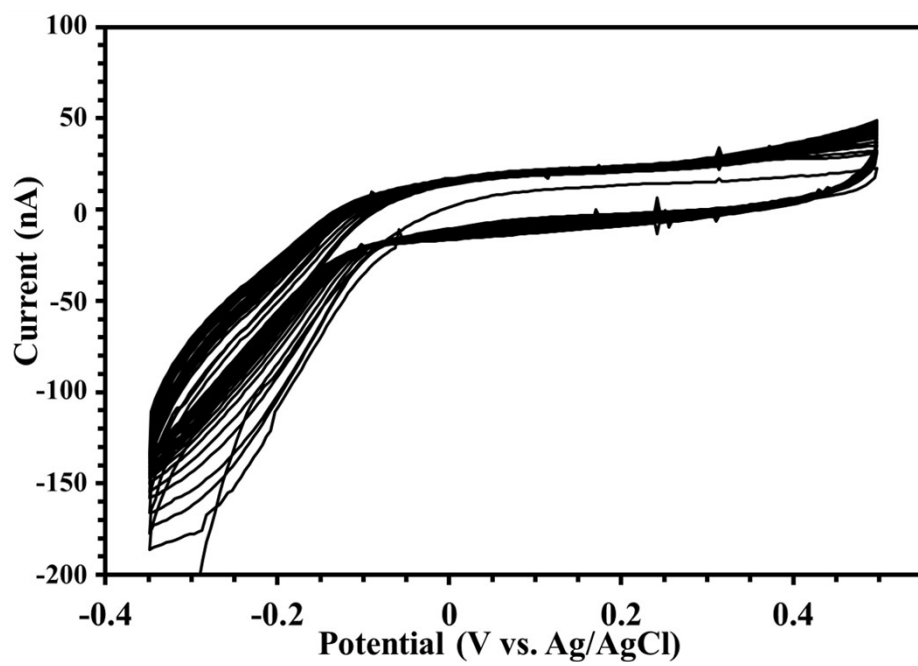

Fig.S3

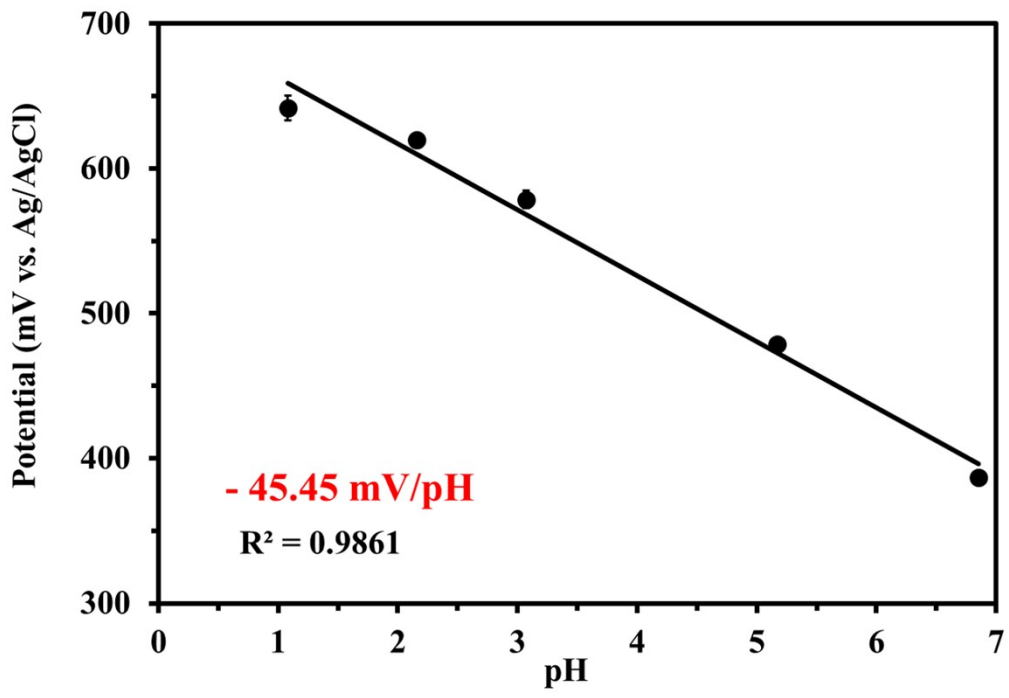

Fig.S4

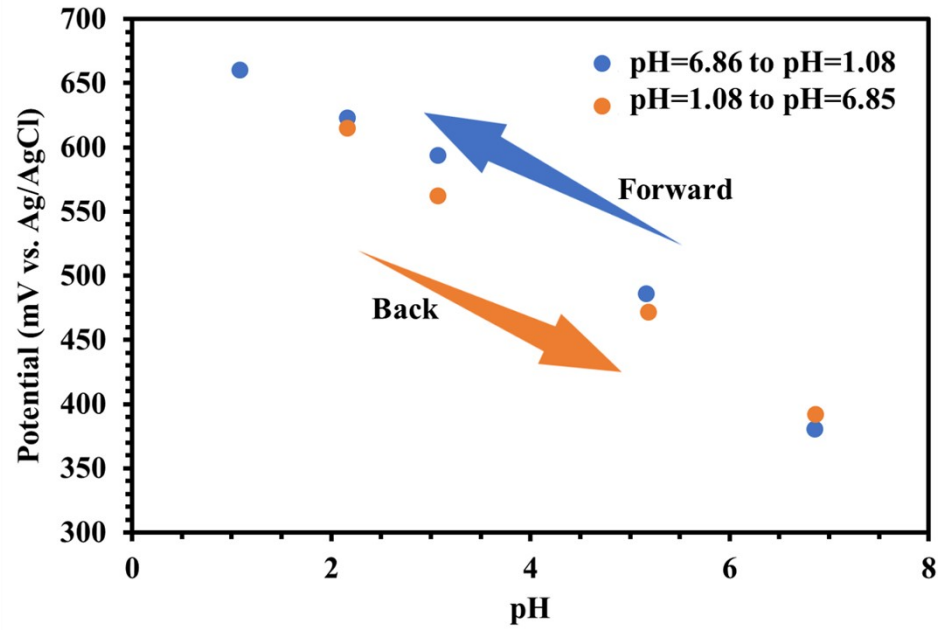

Fig.S5

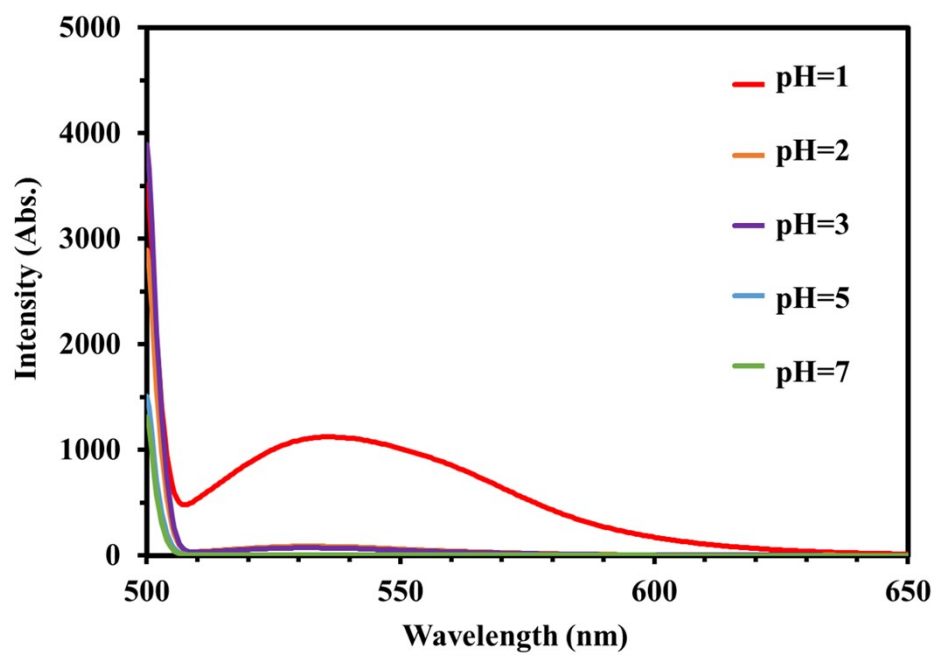



Fig.S6

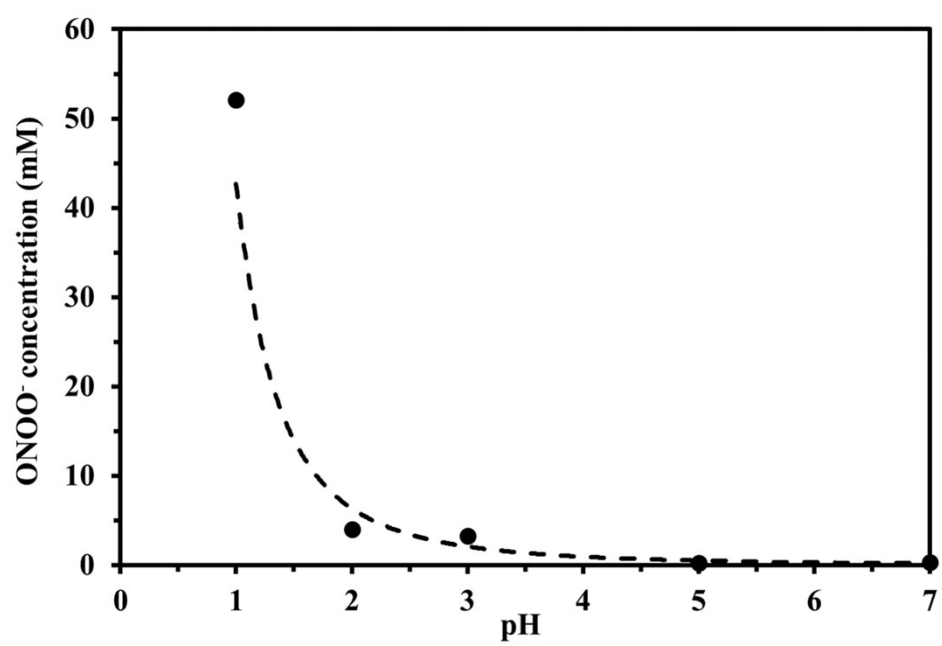

Fig.S7

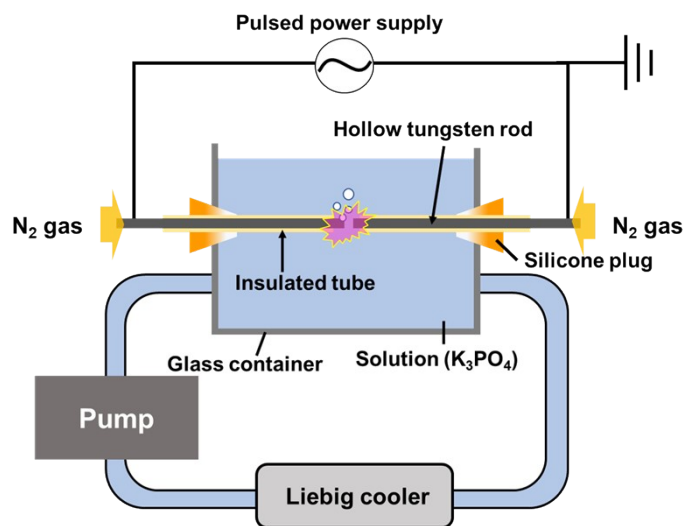

Fig.S8

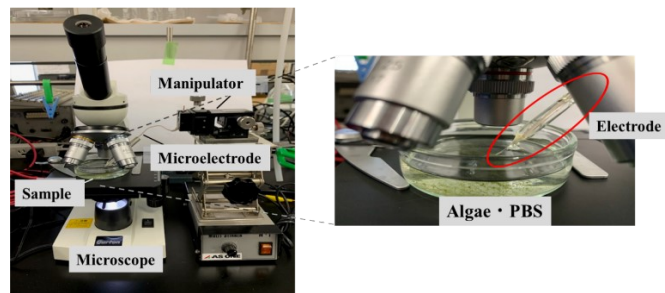

Table S1

| Entry | Content |                              |                               |
|-------|---------|------------------------------|-------------------------------|
|       | pH=3    | NO <sub>2</sub> <sup>-</sup> | H <sub>2</sub> O <sub>2</sub> |
| 1     | ○       | ○                            | ○                             |
| 2     | ○       | ×                            | ○                             |
| 3     | ○       | ○                            | ×                             |
| 4     | ×       | ○                            | ○                             |
| 5     | ○       | ×                            | ×                             |
| 6     | ×       | ×                            | ○                             |
| 7     | ×       | ○                            | ×                             |

Table S2

| Entry | Frequency (kHz) | Pulse Width ( $\mu$ sec) | H $\alpha$ Intensity | H $\beta$ Intensity | Electron temperature (eV) |
|-------|-----------------|--------------------------|----------------------|---------------------|---------------------------|
| 1     | 20              | 0.18                     | 37963                | 5686                | 0.739                     |
| 2     | 20              | 0.38                     | 274789               | 42009               | 0.726                     |
| 3     | 50              | 0.18                     | 4931                 | 722                 | 0.754                     |
| 4     | 50              | 0.38                     | 232097               | 25667               | 0.940                     |
| 5     | 100             | 0.18                     | 174667               | 15479               | 1.09                      |
| 6     | 100             | 0.38                     | 357748               | 46969               | 0.827                     |
| 7     | 120             | 0.18                     | 148314               | 12846               | 1.10                      |
| 8     | 120             | 0.38                     | 357743               | 69730               | 0.565                     |
| 9     | 150             | 0.18                     | 224096               | 16773               | 1.20                      |
| 10    | 200             | 0.18                     | 325009               | 27080               | 1.13                      |

Table S3

| Sample | Content (g/L)                                                                                                                                                                                                                                                                                                                               | Mixture quantity (mL) |
|--------|---------------------------------------------------------------------------------------------------------------------------------------------------------------------------------------------------------------------------------------------------------------------------------------------------------------------------------------------|-----------------------|
| H1     | $\text{KNO}_3$ : 101 g/L (= 1 M)                                                                                                                                                                                                                                                                                                            | 0.5                   |
| H2     | $\text{Ca}(\text{NO}_3)_2 \cdot 4\text{H}_2\text{O}$ : 236 g/L (= 1 M)                                                                                                                                                                                                                                                                      | 0.2                   |
| H3     | $\text{MgSO}_4 \cdot 7\text{H}_2\text{O}$ : 246 g/L (= 1 M)                                                                                                                                                                                                                                                                                 | 0.1                   |
| H4     | $\text{NH}_4\text{H}_2\text{PO}_4$ : 115 g/L (= 1 M)<br>$\text{H}_3\text{BO}_3$ : 1.85 g/L (= 0.03 M)<br>$\text{MnCl}_2 \cdot 4\text{H}_2\text{O}$ : 0.99 g/L (= 0.005 M)<br>$(\text{NH}_4)_6\text{Mo}_7\text{O}_{24} \cdot 4\text{H}_2\text{O}$ : 12.36 g/L (= 0.01 M)<br>$\text{ZnSO}_4 \cdot 7\text{H}_2\text{O}$ : 1.15 g/L (= 0.004 M) | 0.01                  |
| Fe     | Fe (III)-EDTA : 82.4 g/L (= 0.2 M)                                                                                                                                                                                                                                                                                                          | 0.01                  |
| Cu     | $\text{CuSO}_4 \cdot 5\text{H}_2\text{O}$ : 0.50 g/L (= 0.002 M)                                                                                                                                                                                                                                                                            | 0.01                  |
